# Supplementary material for: Control of the optical properties of cadmium selenide nanoparticles using magadiite
Source: Royal Society of Chemistry journal article supplement (doi:10.1039/c7dt03297h), 2017-11-27
Supplement: c7dt03297h1.pdf [file c7dt03297h1.pdf]

## Supporting Information

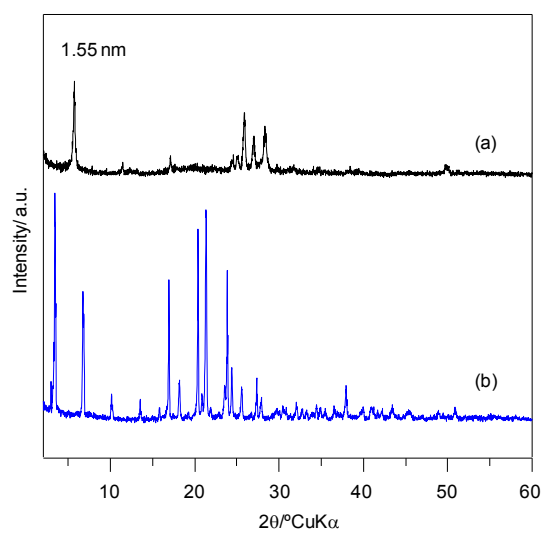

**Figure S1.** XRD patterns of magadiite (a), CTA (b).

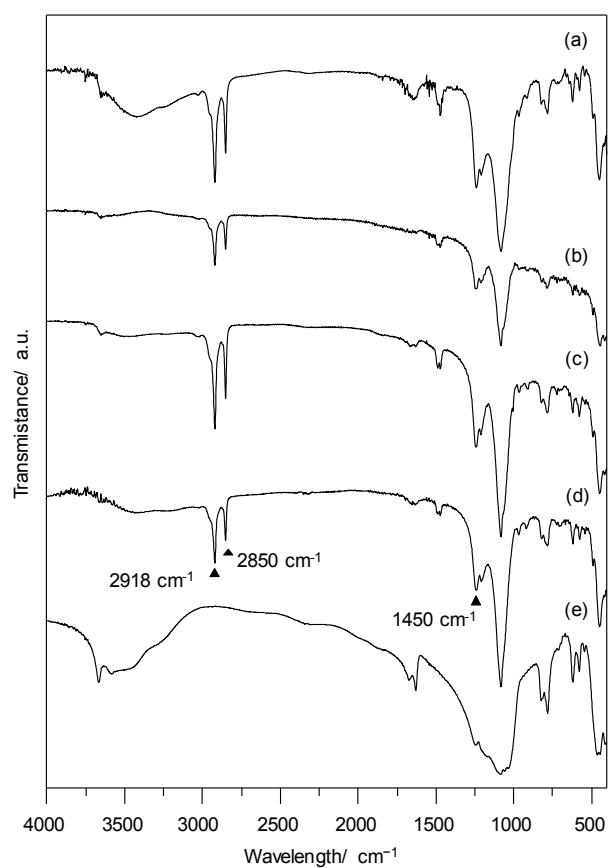

**Figure S2.** FT-IR spectra of CdSe(1)@CTA-magadiite (a), CdSe(0.5)@CTA-magadiite (b), CdSe(0.25)@CTA-magadiite (c), CTA-magadiite (d), magadiite (e).
